# Supplementary material
Source: PubMed Central journal article supplement (PMC4318719)
Supplement: NIHMS645120-supplement-2.pdf [file NIHMS645120-supplement-2.pdf]

**Supplementary Table 1** Super-helical parameters of building block modules

| LRR type  | Rise (Å) | Radius (Å) | Rotation angle (radian) | Number of repeat units used for fitting | Fitted RMSD (Å) |
|-----------|----------|------------|-------------------------|-----------------------------------------|-----------------|
| L22       | 2.34     | 18.67      | 0.24                    | 8                                       | 0.09            |
| L24       | 1.41     | 24.62      | 0.20                    | 9                                       | 0.13            |
| {L28→L29} | 0.82     | 16.52      | 0.31                    | 10                                      | 0.17            |

The L22, L24 and {L28→L29} repeats form unique solenoid shapes which can be described by three super-helical parameters (**radius**: distance to the helical axis, **rise**: projected distance along the helical axis between adjacent units, and **rotation angle**: rotation angle about the helical axis between units). The global helical shapes and parameters are estimated by fitting the three parameters to the repeat protein structures. For the parameter fitting, one of the highly conserved positions, the second Leu in LxxLxLxxN/C motif, is used as a representative for each repeat module. The C $\alpha$  coordinates of the representative positions are obtained from the crystal structures of DLRR\_A (L22) and DLRR\_B (L24), and from the model structure of DLRR\_C ({L28→L29}). Eight to ten C $\alpha$  coordinates are used to fit the same number of coordinates arbitrary generated from the three helical parameters. RMSD between the two coordinate sets is minimized by using non-linear optimization algorithm (*constrOptim.nl*) in *alabama* R package<sup>3,4</sup>. Initial helical parameters, the input of the optimization procedure, are inferred from the transformation matrix between the first two modules of the building block structures. After performing the optimization procedure, the parameter of the lowest RMSD is used to represent the global helical shape of the idealized building block structures (Supplementary Fig. 1b).

**Supplementary Table 2** Module organization and module origins of the multiple fusion designs in Figure 4c.

| Design name | Module organization                                                                                                                         | Individual modules        | Original design |
|-------------|---------------------------------------------------------------------------------------------------------------------------------------------|---------------------------|-----------------|
| DLRR_I      | Ncap-L24 <sup>2</sup> -JN <sub>L24→L32→L24</sub> -JN <sub>L24→L32→L24</sub> -L24 <sup>2</sup>                                               | Ncap-L24 <sup>2</sup>     | DLRR_B          |
|             |                                                                                                                                             | JN <sub>L24→L32→L24</sub> | DLRR_H1         |
|             |                                                                                                                                             | JN <sub>L24→L32→L24</sub> | DLRR_H1         |
|             |                                                                                                                                             | L24 <sup>2</sup>          | DLRR_B          |
| DLRR_J      | Ncap-L22 <sup>4</sup> →L24 <sup>2</sup> -JN <sub>L24→L28→L29</sub> →[L28→L29] <sup>2</sup>                                                  | Ncap-L22 <sup>4</sup>     | DLRR_A          |
|             |                                                                                                                                             | L24 <sup>2</sup>          | DLRR_B          |
|             |                                                                                                                                             | JN <sub>L24→L28</sub>     | DLRR_G3         |
|             |                                                                                                                                             | L29                       | DLRR_G3         |
|             |                                                                                                                                             | [L28→L29] <sup>2</sup>    | DLRR_G3         |
| DLRR_K      | Ncap-L24 <sup>2</sup> -JN <sub>L24→L32→L24</sub> -L24 <sup>3</sup> -<br>JN <sub>L24→L28→L29</sub> →[L28→L29] <sup>2</sup>                   | Ncap-L24 <sup>2</sup>     | DLRR_B          |
|             |                                                                                                                                             | JN <sub>L24→L32→L24</sub> | DLRR_H2         |
|             |                                                                                                                                             | L24 <sup>3</sup>          | DLRR_B          |
|             |                                                                                                                                             | JN <sub>L24→L28</sub>     | DLRR_G6         |
|             |                                                                                                                                             | L29                       | DLRR_G6         |
|             |                                                                                                                                             | [L28→L29] <sup>2</sup>    | DLRR_G6         |
| DLRR_L      | Ncap-L22 <sup>3</sup> →L24 <sup>3</sup> -JN <sub>L24→L32→L24</sub> -L24 <sup>3</sup> -<br>JN <sub>L24→L28→L29</sub> →[L28→L29] <sup>2</sup> | Ncap-L22 <sup>3</sup>     | DLRR_A          |
|             |                                                                                                                                             | L24 <sup>3</sup>          | DLRR_B          |
|             |                                                                                                                                             | JN <sub>L24→L32→L24</sub> | DLRR_H2         |
|             |                                                                                                                                             | L24 <sup>3</sup>          | DLRR_B          |
|             |                                                                                                                                             | JN <sub>L24→L28</sub>     | DLRR_G6         |
|             |                                                                                                                                             | L29                       | DLRR_G6         |
|             |                                                                                                                                             | [L28→L29] <sup>2</sup>    | DLRR_G6         |

**Supplementary Table 3** Number of possible fusion LRR structures with respect to the number of repeat units.

| Number of repeat units | Number of possible LRR structures | Fold change (i) → (i+1) |
|------------------------|-----------------------------------|-------------------------|
| 5                      | 64                                |                         |
| 6                      | 145                               | 2.266                   |
| 7                      | 327                               | 2.255                   |
| 8                      | 736                               | 2.251                   |
| 9                      | 1,655                             | 2.249                   |
| 10                     | 3,720                             | 1.976                   |
| 11                     | 8,360                             | 2.247                   |
| 12                     | 18,786                            | 2.247                   |
| 13                     | 42,213                            | 2.247                   |
| 14                     | 94,853                            | 2.247                   |
| 15                     | 213,134                           | 2.247                   |
| 16                     | 478,909                           | 2.247                   |
| 17                     | 1,076,100                         | 2.247                   |
| 18                     | 2,417,996                         | 2.247                   |
| 19                     | 5,433,237                         | 2.247                   |

LRR structures are generated by recursively following the edges of the network in Figure 4a. The general module assembly starts from Ncap-L22 or Ncap-L24 in the network except  $\{L28 \rightarrow L29\}^n$  and each assembly (transition in the network) adds one repeat unit to the structure. The number of repeat units in the table only considers the internal repeat units excluding N-terminal capping domain.

**Supplementary Table 4** Crystallization conditions

| Design names | Crystallization conditions                                                  |
|--------------|-----------------------------------------------------------------------------|
| DLRR_A       | 22% PEG3350 w/v, 0.1 M MES pH 6.0, 0.2 M NaCl                               |
| DLRR_E       | 20% PEG 1000 v/v, 0.1 M Na/K phosphate pH 6.2                               |
| DLRR_G3      | 2 M ammonium sulfate, 0.1 M Bis-Tris Ph 5.5                                 |
| DLRR_H2      | 22% PEG 3350 w/v, 300 mM Ammonium sulfate, unbuffered                       |
| DLRR_I       | 24% PEG 3350 w/v, 0.2 M ammonium sulfate, 0.1 M HEPES pH 7.5, 0.1 M proline |
| DLRR_K       | 20% PEG-3000, 0.1 M Tris pH 7.0, 0.2 M Ca(OAc) <sub>2</sub>                 |

## Supplementary Table 5 Designed sequences

> DLRR\_A

ETITVSTPIKQIFPDDAFAETIKANLKKKSVTDAVTQNELNSIDQIIANNSDIKSVQGIQYLPNLKTLKLSNNKITDISAL  
KQLNNLGWLDLSNNGITDISALKNLASLHTLDLSNNGITDISALKNLDNLHTLDLSNNGITDISALKNLDNLHTLDLS  
NNGITDISALKNLTSLHTLDLSNNGITDISALKNLDNLETDLRNNGITDKSALKNLNNLKgslehhhhh

>DLRR\_B

TITVSTPIKQIFPDDAFAETIKANLKKKSVTDAVTQNELNSIDQIIANNSDIKSVQGIQYLPNVRYLALGGNKLHDISAL  
KELTNLGWLNLSNNQLETLPQGVFEKLTNLTTLNLSNNQLTSLPQGVFERLASLTTLNLSNNQLTSLPQGVFERLT  
NLTTLNLSNNQLTSLPQGVFERLTNLTTLNLSNNQLTSLPQGVFERLTSLTTLNLSNNQLTSLPQGVFERLTNLKTL  
NLSNNQLQSLPTGVDEKLTQLTgshhhhh

>DLRR\_C

LDLSNQNKTKEDCREIARELKQATTLHELHLSNNNIGEEGAAELVEALLHPGSTLETLDLSNCNLKEACREIARAL  
KQAASLHELHLSNNNIGEEGAAELVEALLHPGSTLETLDLSNCNLKEACREIARALKQATTLHELHLSNNNIGEEG  
AAELVEALLHPGSTLETLDLSNCNLKEACREIARALKQATTLHELHLSNNNIGEEGAAELVEALLHPGSTLETLDL  
SNCNLKEACREIARALKQATSLHELHLSNNNIGEEGKAWLEEARRHPGSTLETgshhhhh

>DLRR\_D

ETITVSTPIKQIFPDDAFAETIKANLKKKSVTDAVTQNELNSIDQIIANNSDIKSVQGIQYLPNLKTLKLSNNKITDISAL  
KQLNNLGWLDLSNNGITDISALKNLASLHTLDLSNNGITDISALKNLDNLHTLDLSNNGITDISALKNLDNLHTLDLS  
NNGITDISALKNLTSLTTLNLSNNQLTSLPQGVFERLTNLTTLNLSNNQLTSLPQGVFERLTNLTTLNLSNNQLTSLP  
QGVFERLTSLTTLNLSNNQLTSLPQGVFERLTNLKTLNLSNNQLQSLPTGVDEKLTQLTgshhhhh

>DLRR\_E

TITVSTPIKQIFPDDAFAETIKANLKKKSVTDAVTQNELNSIDQIIANNSDIKSVQGIQYLPNVRYLALGGNKLHDISAL  
KELTNLGWLNLSNNQLETLPQGVFEKLTNLTTLNLSNNQLTSLPQGVFERLASLTTLNLSNNQLTSLPQGVFERLT  
NLTTLNLSNNQLTSLPQGVFERLTNLTTLNLSNNQLTSLPQGVFERLTSLHTLDLSNNGITDISALKNLDNLHTLDL  
SNNGITDISALKNLDNLHTLDLSNNGITDISALKNLTSLHTLDLSNNGITDISALKNLDNLETDLRNNGITDKSALKN  
LNNLKgslehhhhh

>DLRR\_F1

ETITVSTPIKQIFPDDAFAETIKANLKKKSVTDAVTQNELNSIDQIIANNSDIKSVQGIQYLPNLKTLKLSNNKITDISAL  
KQLNNLGWLDLSNNGITDISALKNLSLHTLDLSNNGITDISALKNLDNLHTLDLSNNGITDISALKNLDNLHTLDLS  
NNGITDISALKNLTSLHTLDLSNNGIENFSAMSNLENLKTNLNSNNRVTKEACKAIAKALKRATSLHELHLSNNNIGE  
EGAAELVEALLHPGSTLETLDLSNCNLTKEACREIARALKQATTLHELHLSNNNIGEEGAAELVEALLHPGSTLET  
LDLSNCNLTKEACREIARALKQATTLHELHLSNNNIGEEGAAELVEALLHPGSTLETLDLSNCNLTKEACREIARALK  
QATSLHELHLSNNNIGEEGKAWLEEARRHPGSTLETgshhhhh

>DLRR\_F2

ETITVSTPIKQIFPDDAFAETIKANLKKKSVTDAVTQNELNSIDQIIANNSDIKSVQGIQYLPNLKTLKLSNNKITDISAL  
KQLNNLGWLDLSNNGITDISALKNLSLHTLDLSNNGITDISALKNLDNLHTLDLSNNGITDISALKNLDNLHTLDLS  
NNGITDISALKNLTSLHTLDLSNNGIENFNALRNLENLKTNLNSNNRVTKDACEAIAEALKRATSLHELHLSNNNIGE  
EGAAELVEALLHPGSTLETLDLSNCNLTKEACREIARALKQATTLHELHLSNNNIGEEGAAELVEALLHPGSTLET  
LDLSNCNLTKEACREIARALKQATTLHELHLSNNNIGEEGAAELVEALLHPGSTLETLDLSNCNLTKEACREIARALK  
QATSLHELHLSNNNIGEEGKAWLEEARRHPGSTLETgshhhhh

>DLRR\_F3

ETITVSTPIKQIFPDDAFAETIKANLKKKSVTDAVTQNELNSIDQIIANNSDIKSVQGIQYLPNLKTLKLSNNKITDISAL  
KQLNNLGWLDLSNNGITDISALKNLSLHTLDLSNNGITDISALKNLDNLHTLDLSNNGITDISALKNLDNLHTLDLS  
NNGITDISALKNLTSLHTLDLSNNGIENFEAMRNLENLKTNLNSNNRLTKEACKAVAEALKRATSLHELHLSNNNIG  
EEGAAELVEALLHPGSTLETLDLSNCNLTKEACREIARALKQATTLHELHLSNNNIGEEGAAELVEALLHPGSTLET  
LDLSNCNLTKEACREIARALKQATTLHELHLSNNNIGEEGAAELVEALLHPGSTLETLDLSNCNLTKEACREIARAL  
KQATSLHELHLSNNNIGEEGKAWLEEARRHPGSTLETgshhhhh

>DLRR\_F4

ETITVSTPIKQIFPDDAFAETIKANLKKKSVTDAVTQNELNSIDQIIANNSDIKSVQGIQYLPNLKTLKLSNNKITDISAL  
KQLNNLGWLDLSNNGITDISALKNLSLHTLDLSNNGITDISALKNLDNLHTLDLSNNGITDISALKNLDNLHTLDLS  
NNGITDISALKNLTSLHTLDLSNNGITNVSALKNLENLKTNLNSNNITKEACKAIAEALKRATSLHELHLSNNNIGEE  
GAAELVEALLHPGSTLETLDLSNCNLTKEACREIARALKQATTLHELHLSNNNIGEEGAAELVEALLHPGSTLETLD  
LSNCNLTKEACREIARALKQATTLHELHLSNNNIGEEGAAELVEALLHPGSTLETLDLSNCNLTKEACREIARALKQ  
ATSLHELHLSNNNIGEEGKAWLEEARRHPGSTLETgshhhhh

>DLRR\_F5

ETITVSTPIKQIFPDDAFAETIKANLKKKSVTDAVTQNELNSIDQIIANNSDIKSVQGIQYLPNLKTLKLSNNKITDISAL

KQLNNLGWLDLSNNGITDISALKNLSLHTLDLSNNGITDISALKNLDNLHTLDLSNNGITDISALKNLDNLHTLDLS  
NNGITDISALKNLTSLHTLDLSNNGIRNLEAMRNLENLKTNLNSNNVTKEACSAEALKRATSLHELHLSNNNIG  
EEGAAELVEALLHPGSTLETLDLSNCNLKEACREIARALKQATTLHELHLSNNNIGEEGAAELVEALLHPGSTLET  
LDLSNCNLKEACREIARALKQATTLHELHLSNNNIGEEGAAELVEALLHPGSTLETLDLSNCNLKEACREIARAL  
KQATSLHELHLSNNNIGEEGKAWLEEARRHPGSTLETgshhhhh

>DLRR\_F6

ETITVSTPIKQIFPDDAFAETIKANLKKKSVTDAVTQNELNSIDQIIANNSDIKSVQGIQYLPNLKTLKLSNNKITDISAL  
KQLNNLGWLDLSNNGITDISALKNLSLHTLDLSNNGITDISALKNLDNLHTLDLSNNGITDISALKNLDNLHTLDLS  
NNGITDISALKNLTSLHTLDLSNNGIRNFEAMRNLENLKTNLNSNNFTKEACSAEALKRATSLHELHLSNNNIG  
EEGAAELVEALLHPGSTLETLDLSNCNLKEACREIARALKQATTLHELHLSNNNIGEEGAAELVEALLHPGSTLET  
LDLSNCNLKEACREIARALKQATTLHELHLSNNNIGEEGAAELVEALLHPGSTLETLDLSNCNLKEACREIARAL  
KQATSLHELHLSNNNIGEEGKAWLEEARRHPGSTLETgshhhhh

>DLRR\_G1

TITVSTPIKQIFPDDAFAETIKANLKKKSVTDAVTQNELNSIDQIIANNSDIKSVQGIQYLPNVRYLALGGNKLHDISAL  
KELTNLGWLNLSNNQLETLPQGVFEKLTNLTTLNLSNNQLTSLPQGVFERLASLTTLNLSNNQLTSLPQGVFERLT  
NLTTLNLSNNQLTSLPQGVFERLTNLTTLNLSNNQLTSLPQGVFERLTSLTTLNLSNNQLTSLPDGVLERLTNLKTL  
NLSNNQITKEVCRHVAKILKQAASLHELHLSNNNIGEEGAAELVEALLHPGSTLETLDLSNCNLKEACREIARALK  
QATTLHELHLSNNNIGEEGAAELVEALLHPGSTLETLDLSNCNLKEACREIARALKQATTLHELHLSNNNIGEEGA  
AELVEALLHPGSTLETLDLSNCNLKEACREIARALKQATSLHELHLSNNNIGEEGKAWLEEARRHPGSTLETgshh  
hhh

>DLRR\_G2

TITVSTPIKQIFPDDAFAETIKANLKKKSVTDAVTQNELNSIDQIIANNSDIKSVQGIQYLPNVRYLALGGNKLHDISAL  
KELTNLGWLNLSNNQLETLPQGVFEKLTNLTTLNLSNNQLTSLPQGVFERLASLTTLNLSNNQLTSLPQGVFERLT  
NLTTLNLSNNQLTSLPQGVFERLTNLTTLNLSNNQLTSLPQGVFERLTSLTTLNLSNNQLTSLPDGVFERLTNLKTL  
NLSNNQLTKEACRIVAKMLKQLASLHELHLSNNNIGEEGAAELVEALLHPGSTLETLDLSNCNLKEACREIARALK  
QATTLHELHLSNNNIGEEGAAELVEALLHPGSTLETLDLSNCNLKEACREIARALKQATTLHELHLSNNNIGEEGA  
AELVEALLHPGSTLETLDLSNCNLKEACREIARALKQATSLHELHLSNNNIGEEGKAWLEEARRHPGSTLETgshh  
hhh

>DLRR\_G3

TITVSTPIKQIFPDDAFAETIKANLKKKSVTDAVTQNELNSIDQIIANNSDIKSVQGIQYLPNVRYLALGGNKLHDISAL  
KELTNLGLWLNLSNNQLETLPQGVFEKLTNLTTLNLSNNQLTSLPQGVFERLASLTTLNLSNNQLTSLPQGVFERLT  
NLTTLNLSNNQLTSLPQGVFERLTNLTTLNLSNNQLTSLPQGVFERLTSLTTLNLSNNQLTSLPDGVFERLTNLKTL  
NLSNNQLTKEACRAVANALKQAASLHELHLSNNNIGEEGAAELVEALLHPGSTLETLDLNSCNLTKEACREIARAL  
KQATTLHELHLSNNNIGEEGAAELVEALLHPGSTLETLDLNSCNLTKEACREIARALKQATTLHELHLSNNNIGEEG  
AAELVEALLHPGSTLETLDLNSCNLTKEACREIARALKQATSLHELHLSNNNIGEEGKAWLEEARRHPGSTLETgsh  
hhhhh

>DLRR\_G4

TITVSTPIKQIFPDDAFAETIKANLKKKSVTDAVTQNELNSIDQIIANNSDIKSVQGIQYLPNVRYLALGGNKLHDISAL  
KELTNLGLWLNLSNNQLETLPQGVFEKLTNLTTLNLSNNQLTSLPQGVFERLASLTTLNLSNNQLTSLPQGVFERLT  
NLTTLNLSNNQLTSLPQGVFERLTNLTTLNLSNNQLTSLPQGVFERLTSLTTLNLSNNQLTSLPDGVLERLTNLKTL  
NLSNNQITKEVCRLVAKFLKQLASLHELHLSNNNIGEEGAAELVEALLHPGSTLETLDLNSCNLTKEACREIARALK  
QATTLHELHLSNNNIGEEGAAELVEALLHPGSTLETLDLNSCNLTKEACREIARALKQATTLHELHLSNNNIGEEGA  
AELVEALLHPGSTLETLDLNSCNLTKEACREIARALKQATSLHELHLSNNNIGEEGKAWLEEARRHPGSTLETgshh  
hhh

>DLRR\_G5

TITVSTPIKQIFPDDAFAETIKANLKKKSVTDAVTQNELNSIDQIIANNSDIKSVQGIQYLPNVRYLALGGNKLHDISAL  
KELTNLGLWLNLSNNQLETLPQGVFEKLTNLTTLNLSNNQLTSLPQGVFERLASLTTLNLSNNQLTSLPQGVFERLT  
NLTTLNLSNNQLTSLPQGVFERLTNLTTLNLSNNQLTSLPQGVFERLTSLTTLNLSNNQLTSLPDGVFERLTNLKTL  
NLSNNQITKEVCRMVAKVLKQAASLHELHLSNNNIGEEGAAELVEALLHPGSTLETLDLNSCNLTKEACREIARAL  
KQATTLHELHLSNNNIGEEGAAELVEALLHPGSTLETLDLNSCNLTKEACREIARALKQATTLHELHLSNNNIGEEG  
AAELVEALLHPGSTLETLDLNSCNLTKEACREIARALKQATSLHELHLSNNNIGEEGKAWLEEARRHPGSTLETgsh  
hhhhh

>DLRR\_G6

TITVSTPIKQIFPDDAFAETIKANLKKKSVTDAVTQNELNSIDQIIANNSDIKSVQGIQYLPNVRYLALGGNKLHDISAL  
KELTNLGLWLNLSNNQLETLPQGVFEKLTNLTTLNLSNNQLTSLPQGVFERLASLTTLNLSNNQLTSLPQGVFERLT  
NLTTLNLSNNQLTSLPQGVFERLTNLTTLNLSNNQLTSLPQGVFERLTSLTTLNLSNNQLTSLPKGVLERLTNLKTL  
NLSNNQITKEVCRHVAELLKQAASLHELHLSNNNIGEEGAAELVEALLHPGSTLETLDLNSCNLTKEACREIARALK  
QATTLHELHLSNNNIGEEGAAELVEALLHPGSTLETLDLNSCNLTKEACREIARALKQATSLHELHLSNNNIGEEGK  
AWLEEARRHPGSTLETgshhhhhh



>DLRR\_H1

TITVSTPIKQIFPDDAFAETIKANLKKKSVTDAVTQNELNSIDQIIANNSDIKSVQGIQYLPNVRYLALGGNKLHDISAL  
KELTNLGLWLNLSNNQLETLPQGVFEKLTNLTTLNLSNNQLTSLPQGVFERLASLTTLNLSNNNIANINDQMLEGLT  
NLTTLNLSHNNLARLWKHANPGGPIYFLKGLTNLTTLNLSNNGFDEIPREVFKDLSLTTLNLSNNQLTSLPQGVFE  
RLTNLKTNLNSNNQLQSLPTGVDEKLTQLTgshhhhhh

>DLRR\_H2

TITVSTPIKQIFPDDAFAETIKANLKKKSVTDAVTQNELNSIDQIIANNSDIKSVQGIQYLPNVRYLALGGNKLHDISAL  
KELTNLGLWLNLSNNQLETLPQGVFEKLTNLTTLNLSNNQLTSLPQGVFERLASLTTLNLSNNLANLNDKVFEGLT  
NLTTLNLSNNLARLWKHANPGGPIYFLKGLTNLTTLNLSNNGFDEFPKEVFKDLSLTTLNLSNNQLTSLPQGVF  
ERLTNLKTNLNSNNQLQSLPTGVDEKLTQLTgshhhhhh

>DLRR\_H3

TITVSTPIKQIFPDDAFAETIKANLKKKSVTDAVTQNELNSIDQIIANNSDIKSVQGIQYLPNVRYLALGGNKLHDISAL  
KELTNLGLWLNLSNNQLETLPQGVFEKLTNLTTLNLSNNQLTSLPQGVFERLASLTTLNLSNNLANLNDRLLEGLT  
NLTTLNLSNNLARLWKHANPGGPIYFLKGLTNLTTLNLSNNGFDEFPREVFKDLSLTTLNLSNNQLTSLPQGVF  
ERLTNLKTNLNSNNQLQSLPTGVDEKLTQLTgshhhhhh

>DLRR\_H4

TITVSTPIKQIFPDDAFAETIKANLKKKSVTDAVTQNELNSIDQIIANNSDIKSVQGIQYLPNVRYLALGGNKLHDISAL  
KELTNLGLWLNLSNNQLETLPQGVFEKLTNLTTLNLSNNQLTSLPQGVFERLASLTTLNLSNNLANLNDRVFEGLT  
NLTTLNLSNNLARLWKHANPGGPIYFLKGLTNLTTLNLSNNGFDELPKEVFKDLSLTTLNLSNNQLTSLPQGVF  
ERLTNLKTNLNSNNQLQSLPTGVDEKLTQLTgshhhhhh

>DLRR\_I

TITVSTPIKQIFPDDAFAETIKANLKKKSVTDAVTQNELNSIDQIIANNSDIKSVQGIQYLPNVRYLALGGNKLHDISAL  
KELTNLGLWLNLSNNQLETLPQGVFEKLTNLTTLNLSNNQLTSLPQGVFERLASLTTLNLSNNNIANINDQMLEGLT  
NLTTLNLSHNNLARLWKHANPGGPIYFLKGLTNLTTLNLSNNGFDEIPREVFKDLSLTTLNLSNNNIANINDQMLE  
GLTNLTTLNLSHNNLARLWKHANPGGPIYFLKGLTNLTTLNLSNNGFDEIPREVFKDLSLTTLNLSNNQLTSLPQG  
VFERLTNLKTNLNSNNQLQSLPTGVDEKLTQLTgshhhhhh

>DLRR\_J

ETITVSTPIKQIFPDDAFAETIKANLKKKSVTDAVTQNELNSIDQIIANNSDIKSVQGIQYLPNLKTLKLSNNKITDISAL

KQLNNLGWLDLSNNGITDISALKNLSLHTLDLSNNGITDISALKNLDNLHTLDLSNNGITDISALKNLDNLHTLDLS  
NNGITDISALKNLTSLTTLNLSNQLTSLPQGVFERLTNLTTNLSNQLTSLPQGVFERLTNLTTNLSNQLTSLP  
QGVFERLTNLKTLNLSNQLTKEACRAVANALKQAASLHELHLSNNNIGEEGAAELVEALLHPGSTLETLDLNCN  
LTKEACREIARALKQATTLHELHLSNNNIGEEGAAELVEALLHPGSTLETLDLNCNLTKEACREIARALKQATT  
LHLSNNNIGEEGKAWLEEARRHPGSTLETgshhhhh

>DLRR\_K

TITVSTPIKQIFPDDAFAETIKANLKKKSVTDAVTQNELNSIDQIIANNSDIKSVQGIQYLPNVRYLALGGNKLH  
DISAL  
KELTNLGWLNLSNQLTSLPQGVFEKLTNLTTNLSNQLTSLPQGVFERLASLTTLNLSNNLANLNDRVFEG  
LT  
NLTTNLSNNLARLWKHANPGGPIYFLKGLTNLTTLNLSNNGFDELPKEVFKDLTSLTTLNLSNQLTSLPQ  
GV  
ERLTNLTTNLSNQLTSLPQGVFERLTNLTTNLSNQLTSLPQGVFERLTSLTTLNLSNQLTSLPKGVLER  
LT  
LKTTLNLSNQLTKEVCRHVAELLKQAASLHELHLSNNNIGEEGAAELVEALLHPGSTLETLDLNCNLTKE  
ACREIA  
RALKQATTLHELHLSNNNIGEEGAAELVEALLHPGSTLETLDLNCNLTKEACREIARALKQATSLHELH  
LSNN  
IGEEGKAWLEEARRHPGSTLETgshhhhh

>DLRR\_L

ETITVSTPIKQIFPDDAFAETIKANLKKKSVTDAVTQNELNSIDQIIANNSDIKSVQGIQYLPNLKTLKLS  
NNKITDISAL  
KQLNNLGWLDLSNNGITDISALKNLSLHTLDLSNNGITDISALKNLDNLHTLDLSNNGITDISALKNLTSL  
TTLNLS  
NQLTSLPQGVFERLTNLTTNLSNQLTSLPQGVFERLTNLTTNLSNQLTSLPQGVFERLTSLTTLNLSN  
NLA  
NLNDRVFEGLTNLTTNLSNNLARLWKHANPGGPIYFLKGLTNLTTLNLSNNGFDELPKEVFKDLTSLT  
TLNLS  
NQLTSLPQGVFERLTNLTTNLSNQLTSLPQGVFERLTNLTTNLSNQLTSLPQGVFERLTSLTTLNLS  
NQLT  
SLPKGVLERLTNLKTLNLSNQLTKEVCRHVAELLKQAASLHELHLSNNNIGEEGAAELVEALLHPGST  
LETLDL  
SN  
CNLTKEACREIARALKQATTLHELHLSNNNIGEEGAAELVEALLHPGSTLETLDLNCNLTKEACREIA  
RALKQ  
ATS  
LHELHLSNNNIGEEGKAWLEEARRHPGSTLETgshhhhh

\*C-terminal linkers and 6x His tags are shown in lower case.

\*AS or TS in the regular repeat sequences are for inserting the restriction sites (NheI and SpeI).

## Supplementary References

1. Altschul, S.F. et al. Gapped BLAST and PSI-BLAST: a new generation of protein database search programs. *Nucleic Acids Res* **25**, 3389-402 (1997).
2. Y. Zhang, J. Skolnick, TM-align: A protein structure alignment algorithm based on TM-score, *Nucleic Acids Research* **33**, 2302-09 (2005)
3. R Core Team R: A language and environment for statistical computing R Foundation for Statistical Computing, Vienna, Austria. ISBN 3-900051-07-0, URL <http://www.R-project.org/> (2012)
4. Ravi Varadhan, alabama: Constrained nonlinear optimization. R package version 2011.9-1. <http://CRAN.R-project.org/package=alabama> (2012)
